# Supplementary material
Source: ML conference proceedings conference paper supplement (https://openreview.net/forum?id=aiGN4UnNM7)
Supplement: supplementary_material [file attachment]

---

# Supplementary Material for TSTTC

---

## 1 The TSTTC Dataset

2 The data, annotation, document, and API are publicly available at cloud disk and github. We take full  
3 responsibility for any rights violations and ensure compliance with the data license. Furthermore, we  
4 add instruction of the proposed dataset in ./Doc of the supplementary materials.

5 **License.** Our dataset is published under CC BY-NC-SA license and only non-commercial research  
6 usage is allowed.

7 **Dataset Maintenance.** We released and dataset and will maintain it for a long time. Besides, we  
8 will also check its accessibility regularly and response for following modification.

9 **Privacy.** In order to protect the privacy of the vehicles and humans appeared in our dataset, we  
10 detect license plates and human faces and then apply a Gaussian blur to detected boxes. Besides, we  
11 conducted experiments to show the impact of the plate blur operation, which could be found in our  
12 appendix.

13 **Social Impacts.** In terms of social impacts, given that the dataset encompasses the analysis of traffic  
14 or transportation-related scenarios, there exists a potential risk that models trained on this dataset  
15 could generate erroneous predictions, consequently misleading and potentially facilitating unsafe  
16 behaviors or actions. It is imperative to consider these limitations and safety concerns in order to  
17 ensure the responsible and accurate application of the proposed methods and dataset.
